# Supplementary material for: Sex-specific association of rs4746172 of VCL gene with hypertension in two Han populations from Southern China
Source: PubMed Central journal article supplement (PMC4613695; doi:10.1038/srep15245), 2015-10-21
Supplement: srep15245-s1.pdf [file srep15245-s1.pdf]

## **Supplemental materials**

### **Sex-specific association of rs4746172 of *VCL* gene with hypertension in two Han populations from Southern China**

Qin Yu, Hong-Peng Sun, Wan-Qun Chen, Xiao-Qiong Chen, Yong Xu,  
Yong-Han He, Qing-Peng Kong

**Supplemental Table S1.** Selected SNPs associated with blood pressure or hypertension.

| SNP        | Allele | MAF <sup>a</sup> | MAF <sup>b</sup> | MAF <sup>c</sup> | Type                 | Position (GRCh38) | Nearest gene   | Reported association |
|------------|--------|------------------|------------------|------------------|----------------------|-------------------|----------------|----------------------|
| rs2014408  | T/C    | 0.27             | 0.28             | 0.26             | intron               | 11: 16,343,736    | <i>SOX6</i>    | SBP                  |
| rs16823124 | A/G    | 0.35             | 0.43             | 0.41             | intron               | 2: 182359400      | <i>PDE1A</i>   | DBP, MAP             |
| rs4746172  | T/C    | 0.36             | 0.38             | 0.33             | intron               | 10: 74096084      | <i>VCL</i>     | DBP, MAP             |
| rs33063    | A/G    | 0.08             | 0.06             | 0.07             | intron               | 16: 69606314      | <i>NFAT5</i>   | PP                   |
| rs7297416  | A/C    | 0.36             | 0.39             | 0.39             | intron               | 12: 54049306      | <i>HOXC4</i>   | SBP                  |
| rs59251428 | T/G    | 0.30             | 0.28             | 0.32             | intron               | 3: 11247993       | <i>HRHI</i>    | SBP                  |
| rs2158394  | G/C    | 0.30             | 0.35             | 0.37             | 2KB upstream variant | 11: 1998765       | <i>H19</i>     | SBP, MAP             |
| rs4245739  | C/A    | 0.04             | 0.03             | 0.03             | 3 prime UTR variant  | 1: 204549714      | <i>MDM4</i>    | DBP                  |
| rs3858313  | G/A    | 0.29             | 0.37             | 0.38             | intron               | 10: 126232158     | <i>ADAM12</i>  | hypertension         |
| rs1570105  | G/A    | 0.42             | 0.43             | 0.44             | intron               | 1: 234293981      | <i>SLC35F3</i> | hypertension         |

MAF, minor allele frequency

<sup>a</sup>MAFs of SNPs in the Southern Han Chinese (CHS) of the 1000 Genomes Project.

<sup>b</sup>MAFs of SNPs in control of Jiangsu population.

<sup>c</sup>MAFs of SNPs in control of Guangdong population.

SBP, systolic blood pressure; DBP, diastolic blood pressure; PP, pulse pressure; MAP, median arterial pressure.

**Supplemental Table S2.** Amplification primers of ten SNPs.

| SNP        | Multiple PCR Primers 5' → 3' |                             |
|------------|------------------------------|-----------------------------|
|            | Forward                      | Reverse                     |
| rs16823124 | AATAAATAACAGTAATAAATCCCTCCAT | TTGTAAATTTGTCCTCTCTAAAAGC   |
| rs4245739  | TGGTTATTAAGGTTTTTATAGCATAATG | ATTCTCTGACAGGTTGGAAATAAA    |
| rs2158394  | CTCAAGTCTCGAGTGTCAAAGC       | AACAGAGGGTTTGCCGAA          |
| rs1570105  | AATTGGGGTCATCTTCGTCT         | TTATGATTTATGCTTTTAGAAAACAGC |
| rs2014408  | TAAATAGAAAATTATCTTCAAATGGGG  | ACCAGAAGACTGTTGATGAAGTAGA   |
| rs33063    | ATATCTTGCAAACCCTAGTGTAGAG    | AATACTAAATCCACAAGGAAAACCTG  |
| rs7297416  | GAAGAGACAAATTTCAATGGAGTT     | AGTGACCTGCATTTACCTC         |
| rs59251428 | AATATTGAGGTCATAATTCCTTTCC    | CCTCCTTATCAAATAAATGAGTTAGC  |
| rs3858313  | AAAGATGTACACATTCTAATTCCTGG   | TTATAAGGACCTTTGTGGTTACGT    |
| rs4746172  | TAGAGCTTATTAGGAAAAAGCTTGC    | AAGTCCATTTTAAGAAAAATATTGGC  |



**Supplemental Table S4.** Allelic associations of SNPs with HT in Guangdong population.

| SNP        | Allele | All                 |                |                |       | Female              |                |                |       | Male                |                |                |       |
|------------|--------|---------------------|----------------|----------------|-------|---------------------|----------------|----------------|-------|---------------------|----------------|----------------|-------|
|            |        | Control<br>n (freq) | HT<br>n (freq) | OR<br>(95% CI) | P     | Control<br>n (freq) | HT<br>n (freq) | OR<br>(95% CI) | P     | Control<br>n (freq) | HT<br>n (freq) | OR<br>(95% CI) | P     |
| rs16823124 | G      | 313 (0.56)          | 334 (0.62)     | 0.79           | 0.065 | 44 (0.55)           | 47 (0.67)      | 0.60           | 0.136 | 269 (0.57)          | 287 (0.61)     | 0.83           | 0.164 |
|            | A      | 241 (0.44)          | 204 (0.38)     | (0.62-1.02)    |       | 36 (0.45)           | 23 (0.33)      | (0.29-1.22)    |       | 205 (0.43)          | 181 (0.39)     | (0.63-1.08)    |       |
| rs4245739  | A      | 541 (0.98)          | 510 (0.97)     | 1.31           | 0.573 | 78 (0.98)           | 69 (0.99)      | NA             |       | 463 (0.98)          | 441 (0.97)     | 1.43           | 0.429 |
|            | C      | 13 (0.02)           | 16 (0.03)      | (0.58-2.98)    |       | 2 (0.02)            | 1 (0.01)       |                |       | 11 (0.02)           | 15 (0.03)      | (0.61-3.49)    |       |
| rs2158394  | C      | 360 (0.65)          | 325 (0.61)     | 1.18           | 0.186 | 53 (0.66)           | 36 (0.51)      | 1.85           | 0.070 | 307 (0.65)          | 289 (0.63)     | 1.1            | 0.496 |
|            | G      | 192 (0.35)          | 205 (0.39)     | (0.92-1.53)    |       | 27 (0.34)           | 34 (0.49)      | (0.91-3.78)    |       | 165 (0.35)          | 171 (0.37)     | (0.83-1.45)    |       |
| rs1570105  | A      | 319 (0.58)          | 294 (0.55)     | 1.13           | 0.330 | 45 (0.56)           | 42 (0.60)      | 0.86           | 0.740 | 274 (0.58)          | 252 (0.54)     | 1.17           | 0.238 |
|            | G      | 235 (0.42)          | 244 (0.45)     | (0.88-1.44)    |       | 35 (0.44)           | 28 (0.40)      | (0.42-1.73)    |       | 200 (0.42)          | 216 (0.46)     | (0.90-1.53)    |       |
| rs2014408  | C      | 409 (0.74)          | 404 (0.75)     | 0.94           | 0.677 | 59 (0.74)           | 51 (0.73)      | 1.05           | 1.000 | 350 (0.74)          | 353 (0.75)     | 0.92           | 0.601 |
|            | T      | 145 (0.26)          | 134 (0.25)     | (0.71-1.24)    |       | 21 (0.26)           | 19 (0.27)      | (0.47-2.3)     |       | 124 (0.26)          | 115 (0.25)     | (0.68-1.25)    |       |
| rs33063    | G      | 509 (0.92)          | 501 (0.95)     | 0.65           | 0.092 | 73 (0.91)           | 65 (0.93)      | 0.80           | 0.771 | 436 (0.92)          | 436 (0.95)     | 0.63           | 0.089 |
|            | A      | 45 (0.08)           | 29 (0.05)      | (0.39-1.09)    |       | 7 (0.09)            | 5 (0.07)       | (0.19-3.10)    |       | 38 (0.08)           | 24 (0.05)      | (0.36-1.1)     |       |
| rs7297416  | C      | 339 (0.61)          | 322 (0.60)     | 1.06           | 0.665 | 51 (0.64)           | 47 (0.67)      | 0.86           | 0.732 | 288 (0.61)          | 275 (0.59)     | 1.09           | 0.550 |
|            | A      | 215 (0.39)          | 216 (0.40)     | (0.82-1.36)    |       | 29 (0.36)           | 23 (0.33)      | (0.41-1.78)    |       | 186 (0.39)          | 193 (0.41)     | (0.83-1.42)    |       |
| rs59251428 | G      | 379 (0.68)          | 363 (0.67)     | 1.04           | 0.746 | 48 (0.60)           | 49 (0.70)      | 0.64           | 0.233 | 331 (0.70)          | 314 (0.67)     | 1.14           | 0.400 |
|            | T      | 175 (0.32)          | 175 (0.33)     | (0.80-1.36)    |       | 32 (0.40)           | 21 (0.30)      | (0.31-1.34)    |       | 143 (0.30)          | 154 (0.33)     | (0.85-1.51)    |       |
| rs3858313  | A      | 347 (0.63)          | 332 (0.62)     | 1.04           | 0.755 | 54 (0.68)           | 47 (0.67)      | 1.02           | 1.000 | 293 (0.62)          | 285 (0.61)     | 1.04           | 0.789 |
|            | G      | 207 (0.37)          | 206 (0.38)     | (0.81-1.34)    |       | 26 (0.32)           | 23 (0.33)      | (0.48-2.13)    |       | 181 (0.38)          | 183 (0.39)     | (0.79-1.36)    |       |
| rs4746172  | C      | 362 (0.65)          | 359 (0.68)     | 0.90           | 0.440 | 55 (0.69)           | 49 (0.70)      | 0.94           | 1.000 | 307 (0.65)          | 310 (0.67)     | 0.89           | 0.408 |
|            | T      | 192 (0.35)          | 171 (0.32)     | (0.69-1.17)    |       | 25 (0.31)           | 21 (0.30)      | (0.44-2.00)    |       | 167 (0.35)          | 150 (0.33)     | (0.67-1.18)    |       |

HT, hypertensive patient; OR, Odds ratio; 95% CI, 95% confidence interval; freq means the frequencies of allele. P values < 0.05 were marked in bold.

**Supplemental Table S5.** Blood pressure parameters among different genotypes in Jiangsu population.

| SNP        | BP parameters | Rare homozygote | Heterozygote   | Frequent homozygote | p     |
|------------|---------------|-----------------|----------------|---------------------|-------|
| rs16823124 | SBP           | 144.40 ± 22.28  | 145.00 ± 22.42 | 145.00 ± 22.57      | 0.941 |
|            | DBP           | 88.04 ± 13.95   | 87.92 ± 12.96  | 86.85 ± 13.90       | 0.269 |
|            | PP            | 56.40 ± 14.58   | 57.12 ± 14.62  | 58.14 ± 14.82       | 0.151 |
|            | MAP           | 106.80 ± 15.75  | 107.00 ± 15.23 | 106.20 ± 15.81      | 0.672 |
| rs2158394  | SBP           | 145.00 ± 22.31  | 144.90 ± 22.66 | 144.90 ± 22.23      | 0.973 |
|            | DBP           | 87.87 ± 13.76   | 87.48 ± 13.65  | 87.65 ± 13.20       | 0.904 |
|            | PP            | 57.08 ± 14.39   | 57.44 ± 14.69  | 57.29 ± 14.75       | 0.981 |
|            | MAP           | 106.90 ± 15.69  | 106.60 ± 15.73 | 106.80 ± 15.25      | 0.949 |
| rs1570105  | SBP           | 145.10 ± 22.67  | 144.10 ± 22.15 | 146.10 ± 22.70      | 0.146 |
|            | DBP           | 87.69 ± 13.32   | 87.08 ± 13.56  | 88.30 ± 13.39       | 0.244 |
|            | PP            | 57.40 ± 14.80   | 56.99 ± 14.59  | 57.78 ± 14.77       | 0.305 |
|            | MAP           | 106.80 ± 15.52  | 106.10 ± 15.46 | 107.60 ± 15.81      | 0.160 |
| rs2014408  | SBP           | 142.50 ± 20.52  | 144.80 ± 22.05 | 145.40 ± 23.02      | 0.347 |
|            | DBP           | 85.51 ± 12.96   | 87.98 ± 13.51  | 87.60 ± 13.49       | 0.170 |
|            | PP            | 56.98 ± 13.63   | 56.86 ± 14.23  | 57.76 ± 15.19       | 0.793 |
|            | MAP           | 104.50 ± 14.53  | 106.90 ± 15.45 | 106.90 ± 15.7       | 0.200 |
| rs7297416  | SBP           | 145.60 ± 22.50  | 145.20 ± 22.74 | 144.30 ± 22.00      | 0.632 |
|            | DBP           | 87.50 ± 14.26   | 87.75 ± 13.26  | 87.41 ± 13.46       | 0.843 |
|            | PP            | 58.08 ± 14.66   | 57.43 ± 14.83  | 56.90 ± 14.48       | 0.518 |
|            | MAP           | 106.90 ± 16.02  | 106.90 ± 15.51 | 106.40 ± 15.35      | 0.779 |
| rs59251428 | SBP           | 144.00 ± 22.69  | 145.40 ± 22.60 | 144.60 ± 22.28      | 0.512 |
|            | DBP           | 86.41 ± 13.67   | 88.03 ± 13.46  | 87.40 ± 13.44       | 0.397 |
|            | PP            | 57.63 ± 14.46   | 57.41 ± 15.20  | 57.22 ± 14.29       | 0.827 |
|            | MAP           | 105.60 ± 15.80  | 107.20 ± 15.48 | 106.5 ± 15.51       | 0.422 |
| rs3858313  | SBP           | 145.00 ± 22.84  | 144.80 ± 22.88 | 145.00 ± 21.80      | 0.994 |
|            | DBP           | 87.50 ± 13.30   | 87.71 ± 13.60  | 87.50 ± 13.38       | 0.969 |
|            | PP            | 57.48 ± 14.90   | 57.14 ± 14.82  | 57.48 ± 14.46       | 0.870 |
|            | MAP           | 106.70 ± 15.58  | 106.80 ± 15.78 | 106.70 ± 15.21      | 0.988 |
| rs4746172  | SBP           | 144.00 ± 21.66  | 145.60 ± 22.79 | 145.60 ± 22.79      | 0.464 |
|            | DBP           | 87.47 ± 13.28   | 87.55 ± 13.26  | 87.55 ± 13.26       | 0.996 |
|            | PP            | 56.51 ± 14.26   | 58.01 ± 14.89  | 58.01 ± 14.89       | 0.151 |
|            | MAP           | 106.30 ± 15.13  | 106.90 ± 15.53 | 106.90 ± 15.53      | 0.839 |

BP, blood pressure; SBP, systolic blood pressure; DBP, diastolic blood pressure; PP, pulse pressure; MAP, median arterial pressure. All quantitative data were presented as mean ± SD. The difference of blood pressure parameters (SBP, DBP, PP, and MAP) among the genotypes of SNPs was analyzed by ANOVA adjusted age and sex.

**Supplemental Table S6.** Blood pressure parameters among different genotypes of the rs330693 and rs4245739 in Jiangu population.

| <b>SNP</b> | <b>Genotype</b> | <b>SBP</b>     | <b>DBP</b>    | <b>PP</b>     | <b>MAP</b>     |
|------------|-----------------|----------------|---------------|---------------|----------------|
| rs33063    | AA + GA         | 144.90 ± 22.77 | 87.44 ± 13.15 | 57.46 ± 14.72 | 106.60 ± 15.49 |
|            | GG              | 144.90 ± 22.39 | 87.61 ± 13.51 | 57.31 ± 14.68 | 106.70 ± 15.52 |
|            | p               | 0.989          | 0.853         | 0.884         | 0.911          |
| rs4245739  | AC + CC         | 144.20 ± 21.04 | 86.98 ± 12.39 | 57.20 ± 13.36 | 106.00 ± 14.50 |
|            | AA              | 145.00 ± 22.51 | 87.62 ± 13.52 | 57.33 ± 14.75 | 106.70 ± 15.57 |
|            | p               | 0.738          | 0.635         | 0.931         | 0.665          |

BP, blood pressure; SBP, systolic blood pressure; DBP, diastolic blood pressure; PP, pulse pressure; MAP, median arterial pressure. All quantitative data were presented as mean ± SD. The difference of blood pressure parameters (SBP, DBP, PP, and MAP) between the genotypes of SNPs was analyzed by student's t-test. Number of subjects with AA and CC genotype for the rs330693 and rs4245739 were too small to analyze, so we combined AA with GA, and AC with CC, compared to GG and AA, respectively.

**Supplemental Table S7.** Blood pressure parameters among different genotypes in Guangdong population.

| SNP        | BP parameters | Rare homozygote | Heterozygote   | Frequent homozygote | p            |
|------------|---------------|-----------------|----------------|---------------------|--------------|
| rs16823124 | SBP           | 128.10 ± 17.55  | 129.50 ± 20.03 | 128.50 ± 18.30      | 0.727        |
|            | DBP           | 86.52 ± 11.57   | 84.42 ± 11.98  | 85.16 ± 11.65       | 0.436        |
|            | PP            | 41.60 ± 11.22   | 45.05 ± 14.25  | 43.39 ± 13.60       | 0.078        |
|            | MAP           | 100.40 ± 12.81  | 99.44 ± 13.58  | 99.62 ± 12.69       | 0.872        |
| rs2158394  | SBP           | 132.30 ± 19.47  | 128.2 ± 18.33  | 128.40 ± 19.73      | 0.114        |
|            | DBP           | 86.87 ± 9.77    | 84.41 ± 12.12  | 85.00 ± 12.08       | 0.139        |
|            | PP            | 45.41 ± 15.03   | 43.79 ± 12.35  | 43.45 ± 14.46       | 0.587        |
|            | MAP           | 102.00 ± 11.83  | 99.00 ± 13.27  | 99.48 ± 13.44       | 0.117        |
| rs1570105  | SBP           | 130.00 ± 17.89  | 128.5 ± 19.01  | 128.90 ± 19.75      | 0.630        |
|            | DBP           | 85.00 ± 10.95   | 85.06 ± 11.98  | 85.00 ± 12.07       | 0.971        |
|            | PP            | 44.96 ± 15.71   | 43.45 ± 12.02  | 43.92 ± 14.58       | 0.672        |
|            | MAP           | 99.99 ± 11.48   | 99.55 ± 13.57  | 99.64 ± 13.41       | 0.864        |
| rs2014408  | SBP           | 130.70 ± 23.56  | 128.10 ± 18.14 | 129.30 ± 19.18      | 0.315        |
|            | DBP           | 87.37 ± 10.78   | 83.95 ± 11.71  | 85.60 ± 11.93       | 0.140        |
|            | PP            | 43.37 ± 17.57   | 44.17 ± 13.07  | 43.73 ± 13.57       | 0.950        |
|            | MAP           | 101.80 ± 13.92  | 98.67 ± 12.77  | 100.20 ± 13.29      | 0.160        |
| rs7297416  | SBP           | 129.80 ± 16.71  | 127.80 ± 18.32 | 130.10 ± 20.76      | 0.395        |
|            | DBP           | 85.91 ± 11.15   | 84.91 ± 12.14  | 84.85 ± 11.62       | 0.669        |
|            | PP            | 43.92 ± 11.76   | 42.90 ± 12.66  | 45.26 ± 15.39       | 0.343        |
|            | MAP           | 100.60 ± 12.06  | 99.21 ± 13.21  | 99.93 ± 13.46       | 0.589        |
| rs59251428 | SBP           | 128.50 ± 19.72  | 128.30 ± 19.33 | 129.50 ± 18.61      | 0.629        |
|            | DBP           | 83.87 ± 11.69   | 84.93 ± 11.90  | 85.39 ± 11.76       | 0.634        |
|            | PP            | 44.60 ± 15.02   | 43.41 ± 12.86  | 44.15 ± 13.93       | 0.773        |
|            | MAP           | 98.73 ± 13.06   | 99.41 ± 13.50  | 100.1 ± 12.83       | 0.609        |
| rs3858313  | SBP           | 127.60 ± 18.21  | 128.80 ± 17.99 | 129.50 ± 20.38      | 0.883        |
|            | DBP           | 84.47 ± 11.74   | 85.63 ± 11.18  | 84.63 ± 12.47       | 0.397        |
|            | PP            | 43.16 ± 12.15   | 43.22 ± 12.98  | 44.89 ± 14.73       | 0.672        |
|            | MAP           | 98.86 ± 13.03   | 100.00 ± 12.40 | 99.59 ± 13.92       | 0.654        |
| rs4746172  | SBP           | 130.30 ± 18.72  | 128.30 ± 20.21 | 129.20 ± 17.89      | 0.559        |
|            | DBP           | 86.76 ± 11.99   | 83.74 ± 12.23  | 85.88 ± 11.19       | <b>0.020</b> |
|            | PP            | 43.56 ± 12.12   | 44.61 ± 13.9   | 43.32 ± 13.65       | 0.417        |
|            | MAP           | 101.30 ± 13.41  | 98.61 ± 13.89  | 100.30 ± 12.20      | 0.110        |

BP, blood pressure; SBP, systolic blood pressure; DBP, diastolic blood pressure; PP, pulse pressure; MAP, median arterial pressure. All quantitative data were presented as mean ± SD. The difference of blood pressure traits (SBP, DBP, PP, and MAP) among the genotypes of SNPs was analyzed by ANOVA adjusted age and sex. P values < 0.05 were marked in bold.



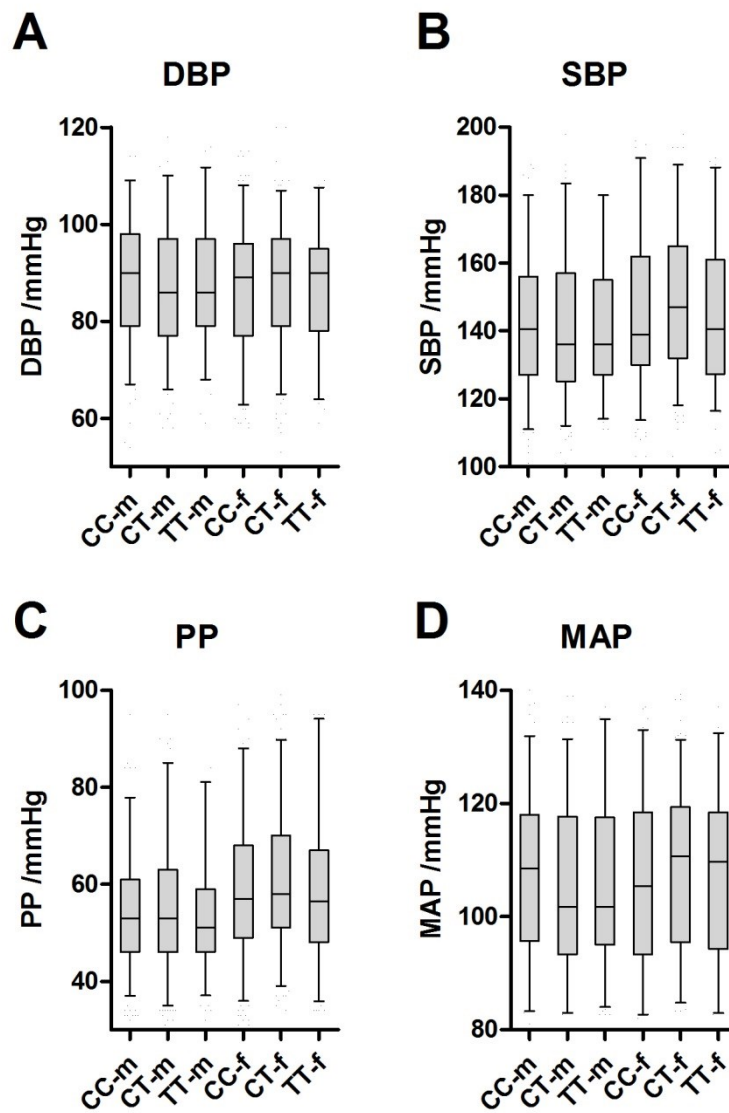

**Supplemental Figure S1. Blood parameters among different genotypes of the rs4746172 in male and female subjects of Jiangsu population.** DBP, diastolic blood pressure; SBP, systolic blood pressure; PP, pulse pressure; MAP, median arterial pressure; CC, CT and TT are the genotypes of rs4746172; f and m mean female and male, respectively. The values of BP parameters were presented as median, 5-95 percentile.
